# Supplementary material for: Reduction of oxygen concentration in 300 mm diameter n-type Czochralski silicon crystal growth using an optimized heating zone with dual side-heaters
Source: Royal Society of Chemistry journal article supplement (doi:10.1039/d4ce00363b), 2024-01-01
Supplement: d4ce00363b1.pdf [file d4ce00363b1.pdf]

Supporting information to “Reduction of oxygen concentration in 300 mm diameter *n*-type Czochralski silicon crystal growth by optimized heating zone with dual side-heaters” by Peidong Liu et al.

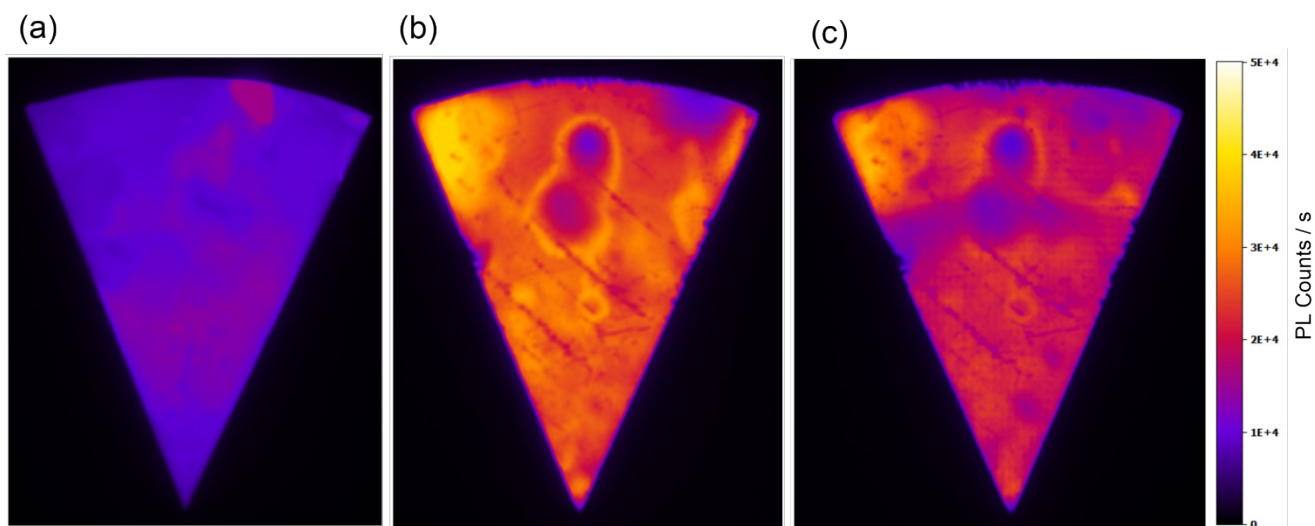

Fig. S1 PL images of the conventional grown 300 mm diameter *n*-type Cz-Si half-quarter wafer before and after subsequent annealing at 1000 °C in an oxygen atmosphere with varied durations (a) 0, (b) 90 and (c) 180 min, which are taken at H= 80 mm with the oxygen concentration of about 14.0 ppm.
